# Supplementary material
Source: Springer Nature journal article supplement (https://www.springermedizin.de/resource/supplementary/12913_2012_2572_MOESM1_ESM.pdf/9530916)

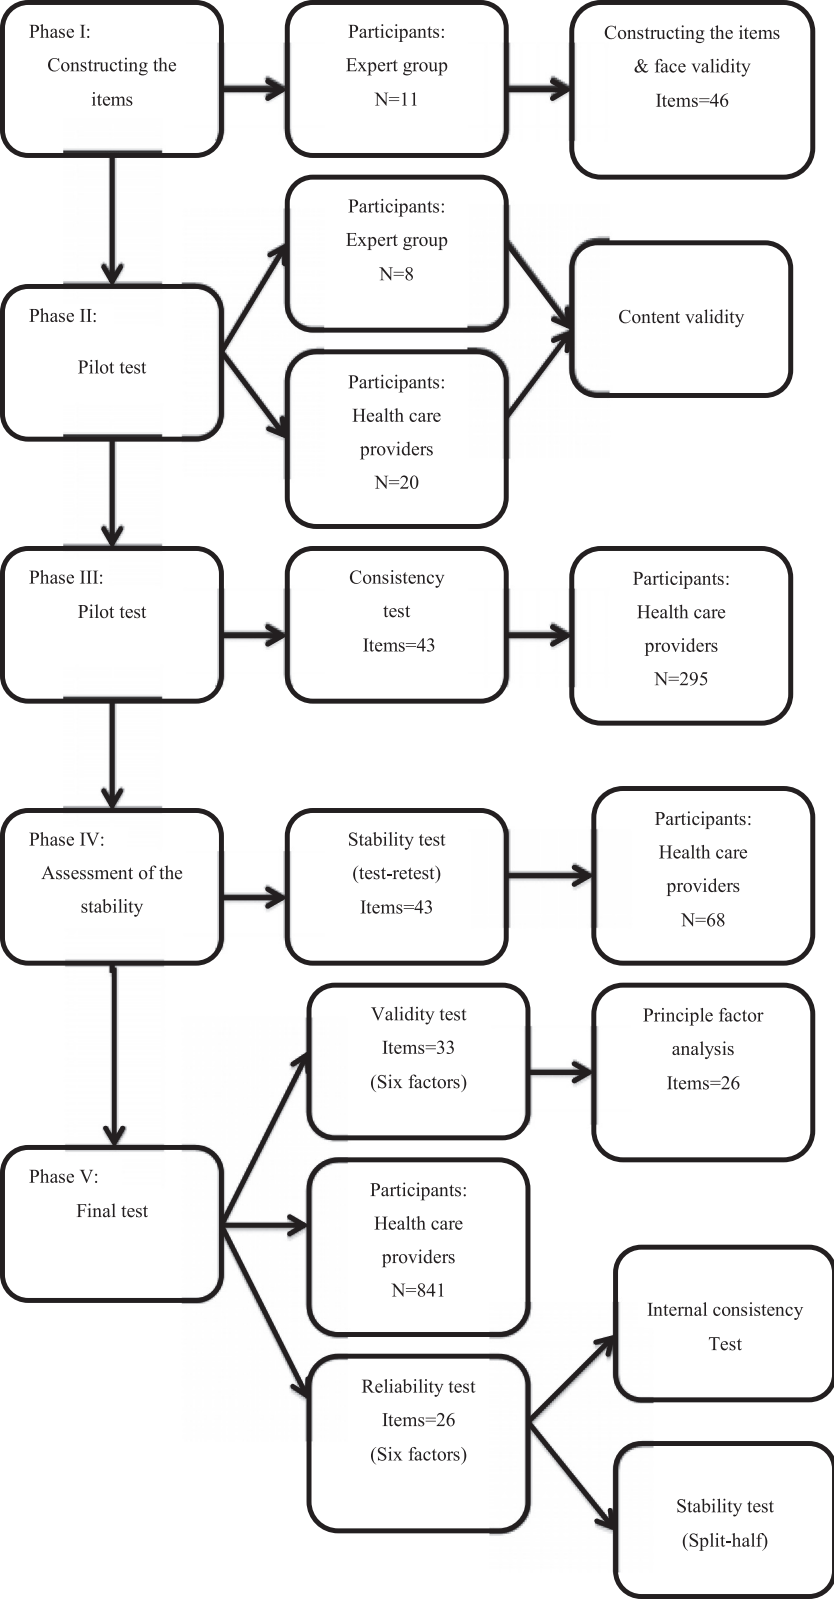

Supplement: MOESM1 [file 9530916]
